# Supplementary material
Source: Royal Society of Chemistry journal article supplement (doi:10.1039/d6ta02599d)
Supplement: d6ta02599d1.pdf [file d6ta02599d1.pdf]

## Supporting information

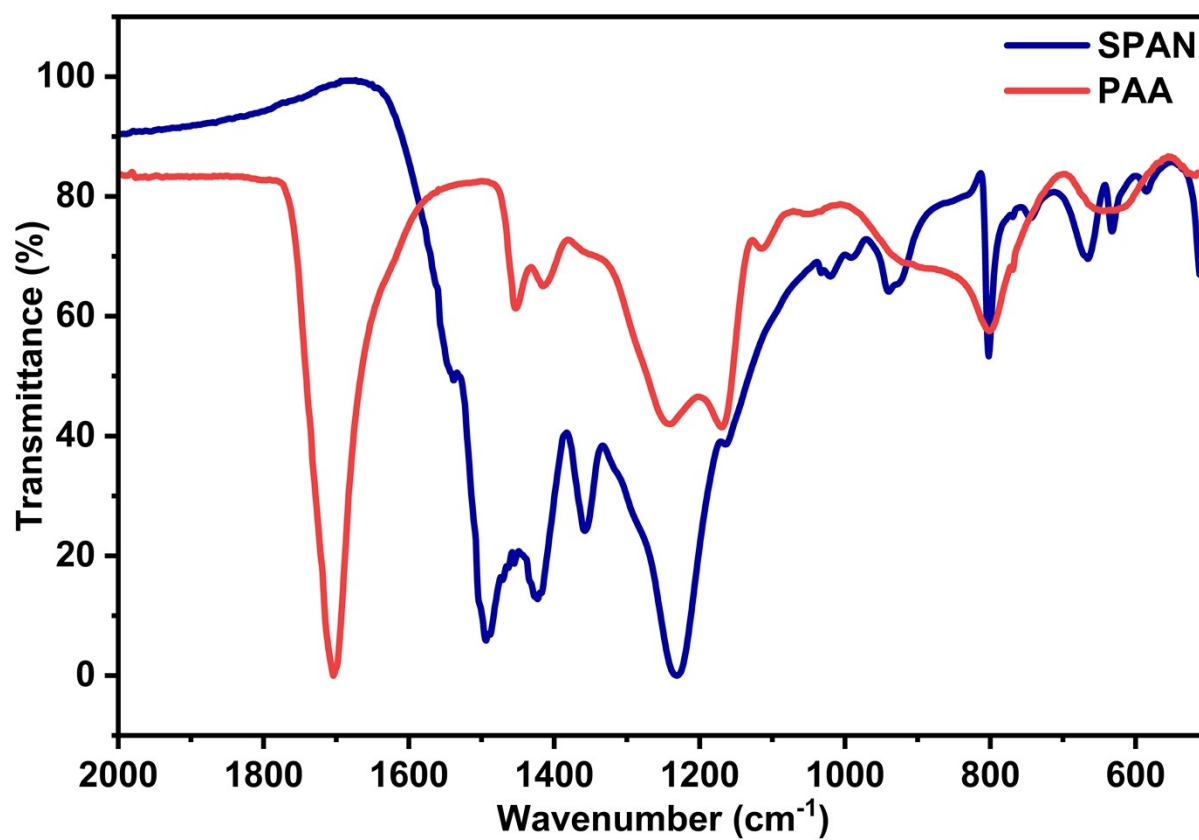

Figure S1 FT-IR spectra of the synthesized SPAN, and PAA

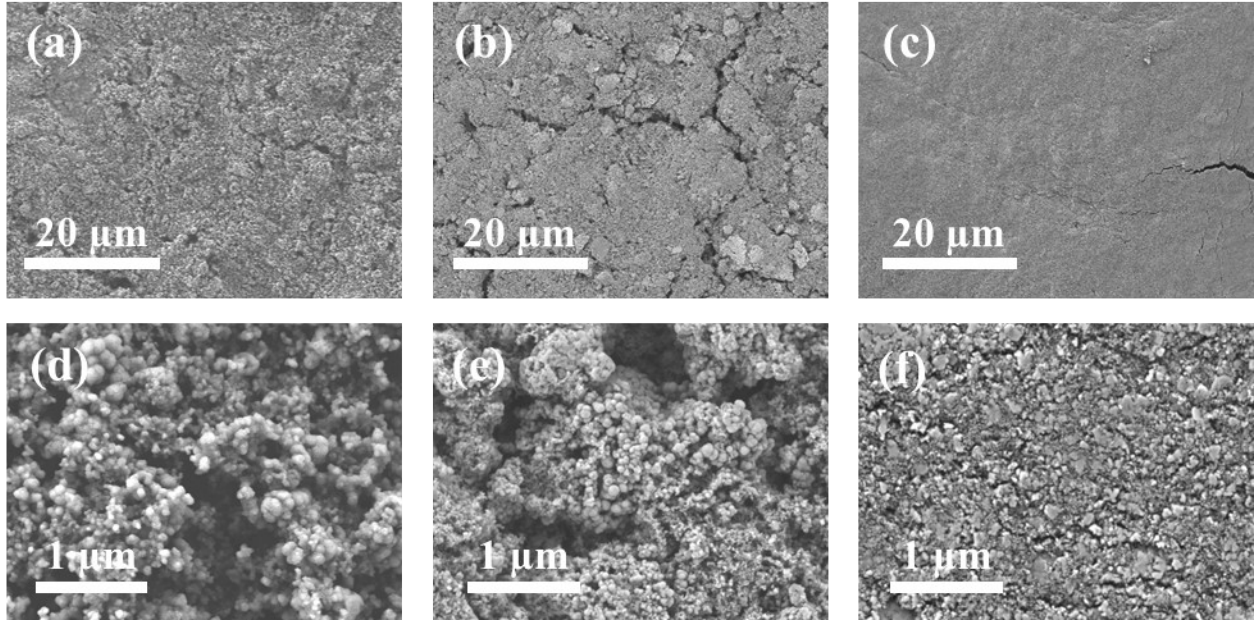

**Figure S2** The SEM images of surface of SPAN electrode before cycling, with the binder PAA (a and d), PVDF (b and e) and TAB 2 (c and f)

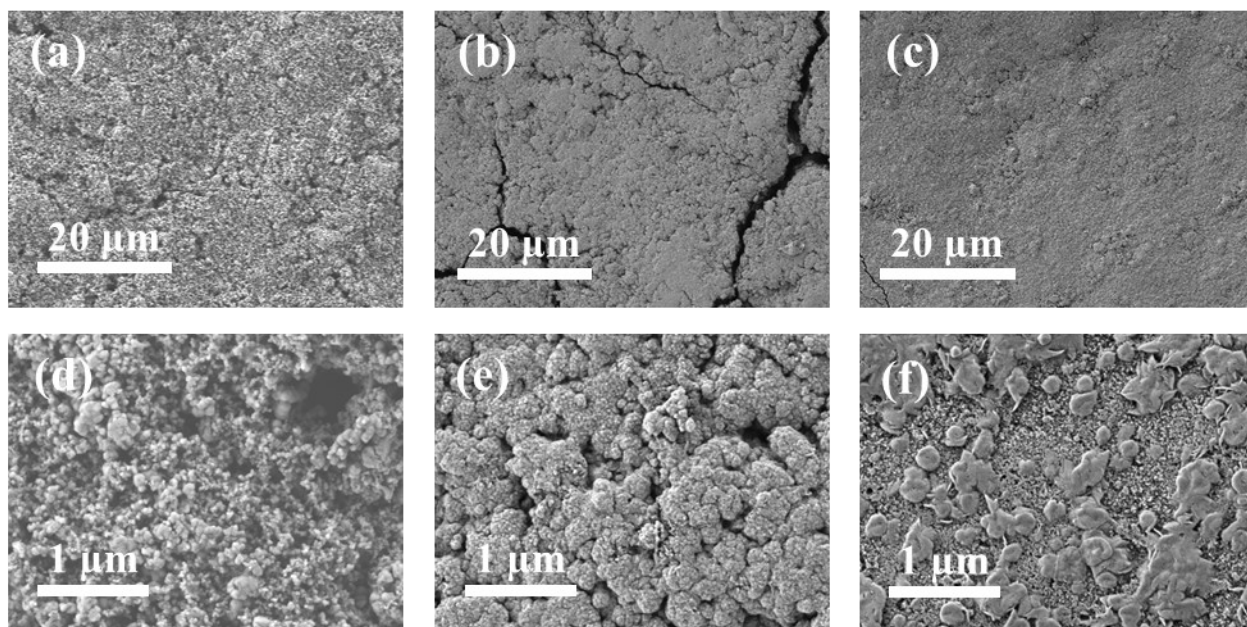

**Figure S3** The SEM images of surface of SPAN electrode after cycling, with the binder PAA (a and d), PVdF (b and e), and TAB 2 (c and f)

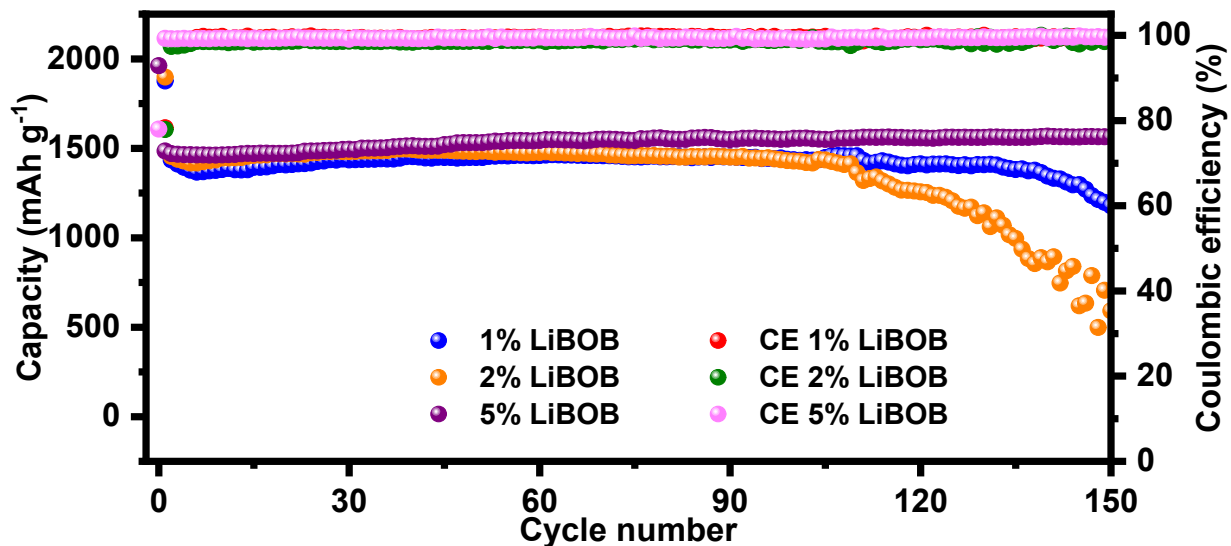

**Figure S4** Comparison of electrochemical performance of Li|SPAN half-cell with electrolyte of 1M LiPF<sub>6</sub> in EC-DEC containing different concentrations of LiBOB additive (wt/v %)

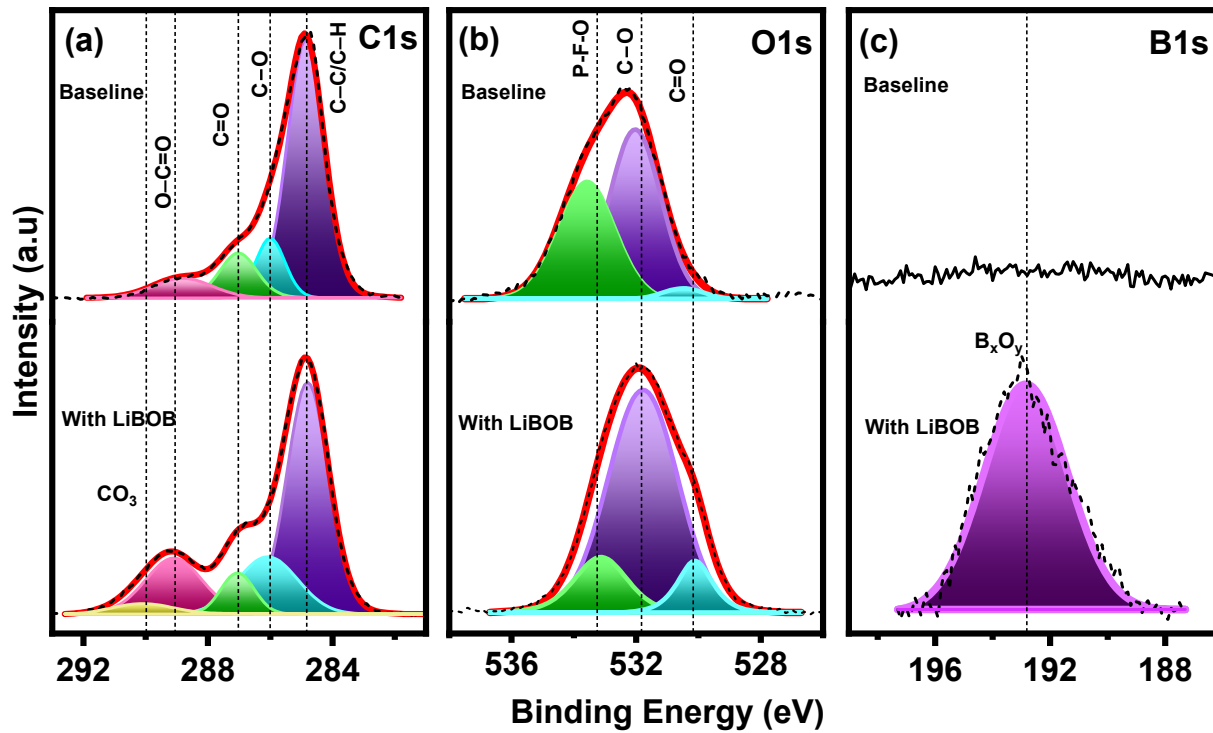

**Figure S5** The C, O and B XPS spectra of SPAN electrodes after three cycles in electrolyte without (baseline) and with 5% LiBOB.

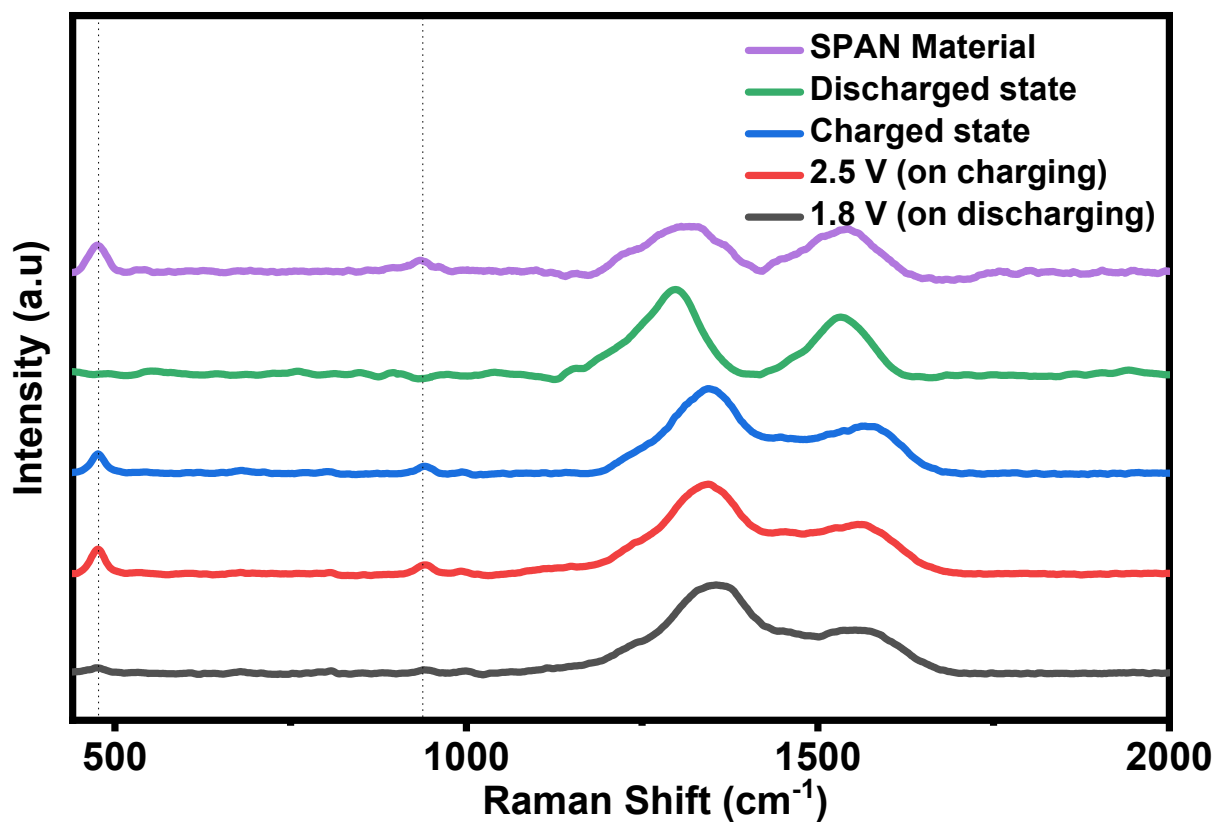

**Figure S6** Raman spectra in the range of 440-2000  $\text{cm}^{-1}$  of SPAN electrode at pristine and various states of discharge–charge.

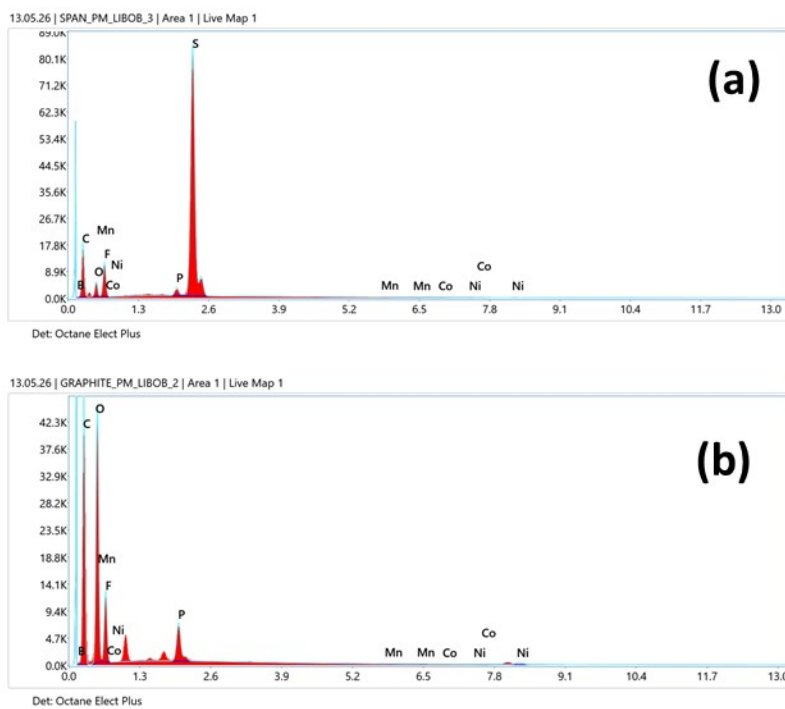

**Figure S7** EDAX spectrum of (a) SPAN electrode, and (b) Graphite electrode

**Table S1** Quantitative result of EDAX analysis of SPAN electrode from SPAN-PAA||NMC111 cell

| <b>Element</b> | <b>Weight %</b> | <b>MDL</b> | <b>Atomic %</b> | <b>Net Int.</b> |
|----------------|-----------------|------------|-----------------|-----------------|
| B K            | 5.5             | 1.87       | 7.0             | 2.6             |
| C K            | 66.1            | 0.23       | 76.0            | 312.0           |
| O K            | 6.4             | 0.11       | 5.5             | 93.0            |
| F K            | 6.6             | 0.04       | 4.8             | 229.7           |
| P K            | 0.4             | 0.01       | 0.2             | 73.5            |
| S K            | 14.9            | 0.01       | 6.4             | 2428.7          |
| Mn K           | 0.0             | 0.04       | 0.0             | 2.0             |
| Co K           | 0.0             | 0.04       | 0.0             | 1.8             |
| Ni K           | 0.0             | 0.05       | 0.0             | 1.3             |

**Table S2** Quantitive result of EDAX analysis of Graphite electrode from Graphite||NMC111 cell

| <b>Element</b> | <b>Weight %</b> | <b>MDL</b> | <b>Atomic %</b> | <b>Net Int.</b> |
|----------------|-----------------|------------|-----------------|-----------------|
| B K            | 5.6             | 0.34       | 6.9             | 7.0             |
| C K            | 57.2            | 0.04       | 63.4            | 813.2           |
| O K            | 30.1            | 0.04       | 25.0            | 863.3           |
| F K            | 6.3             | 0.03       | 4.4             | 247.6           |
| P K            | 0.8             | 0.01       | 0.3             | 183.8           |
| Mn K           | 0.0             | 0.02       | 0.0             | 1.0             |
| Co K           | 0.0             | 0.00       | 0.0             | 0.6             |
| Ni K           | 0.0             | 0.03       | 0.0             | 0.8             |
